# Supplementary material for: Chemical Composition and Antibacterial Activity of Liquid and Volatile Phase of Essential Oils against Planktonic and Biofilm-Forming Cells of Pseudomonas aeruginosa
Source: Molecules. 2022 Jun 25;27(13):4096. doi: 10.3390/molecules27134096 (PMC9268626; doi:10.3390/molecules27134096)
Supplement: Supplementary file 1 [file molecules-27-04096-s001.zip › molecules-1725227-SI.pdf]

# Chemical Composition and Antibacterial Activity of Liquid and Volatile Phase of Essential Oils Against Planktonic and Biofilm-Forming Cells of *Pseudomonas aeruginosa*

Malwina Brożyna <sup>1\*</sup>, Justyna Paleczny <sup>1</sup>, Weronika Kozłowska <sup>2</sup>, Daria Ciecholewska-Juśko <sup>3</sup>, Adam Parfienczyk <sup>4</sup>, Grzegorz Chodaczek <sup>5</sup>, and Adam Junka <sup>1\*</sup>

<sup>1</sup> Department of Pharmaceutical Microbiology and Parasitology, Medical University of Wrocław, 50-367 Wrocław, Poland; justyna.paleczny@student.umw.edu.pl

<sup>2</sup> Division of Pharmaceutical Biotechnology, Department of Pharmaceutical Biology and Biotechnology, Medical University of Wrocław, 50-367 Wrocław, Poland; weronika.kozlowska@umw.edu.pl

<sup>3</sup> Department of Microbiology and Biotechnology, West Pomeranian University of Technology, 70-311 Szczecin, Poland; daria.ciecholewska@zut.edu.pl

<sup>4</sup> Faculty of Medicine, Lazarski University, 02-662 Warsaw, Poland; adam.parfienczyk@lazarski.pl

<sup>5</sup> Bioimaging Laboratory, Lukaszewicz Research Network – PORT Polish Center for Technology Development, 54-066 Wrocław, Poland; grzegorz.chodaczek@port.org.pl

\* Correspondence: malwina.brozyna@student.umw.edu.pl (M.B.); feliks.junka@gmail.com (A.J.)

## A. Thyme oil

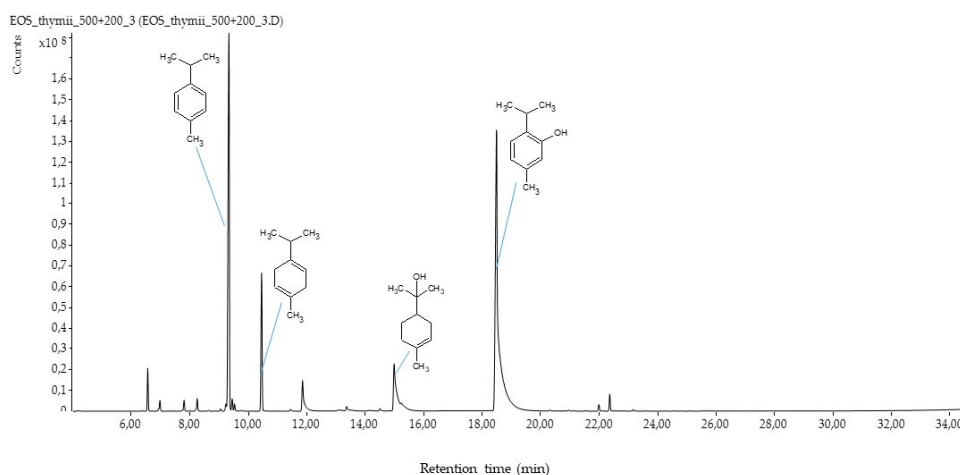

## B. Tea tree oil

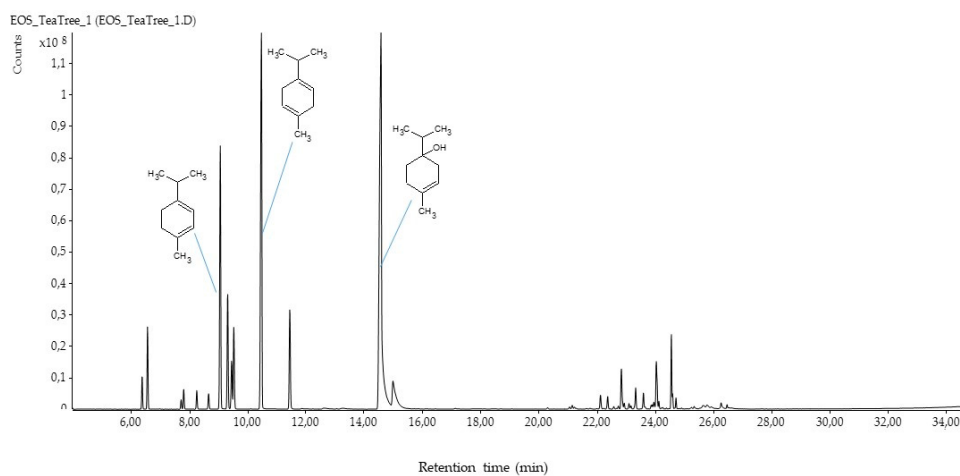

### C. Basil oil

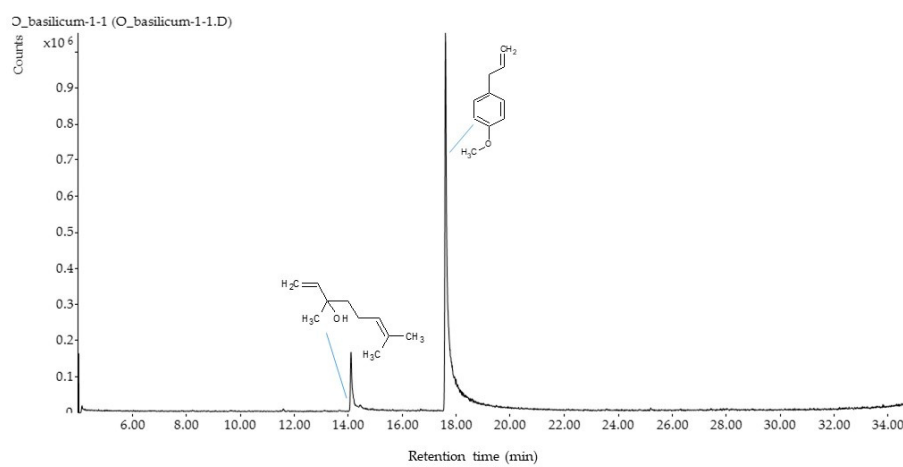

### D. Rosemary oil

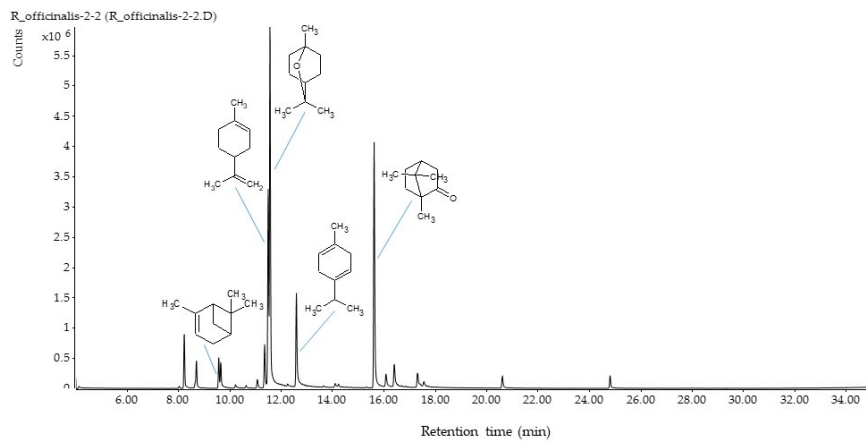

## E. Eucalyptus oil

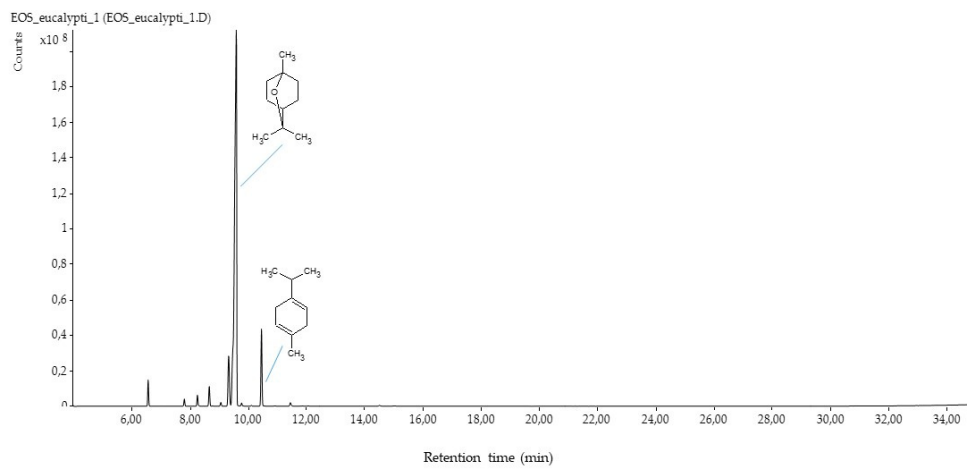

## F. Menthol mint oil

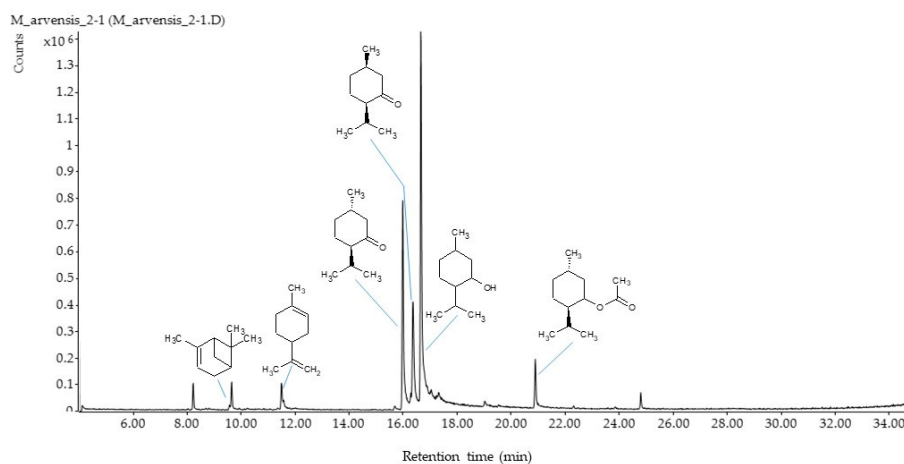

### G. Lavender oil

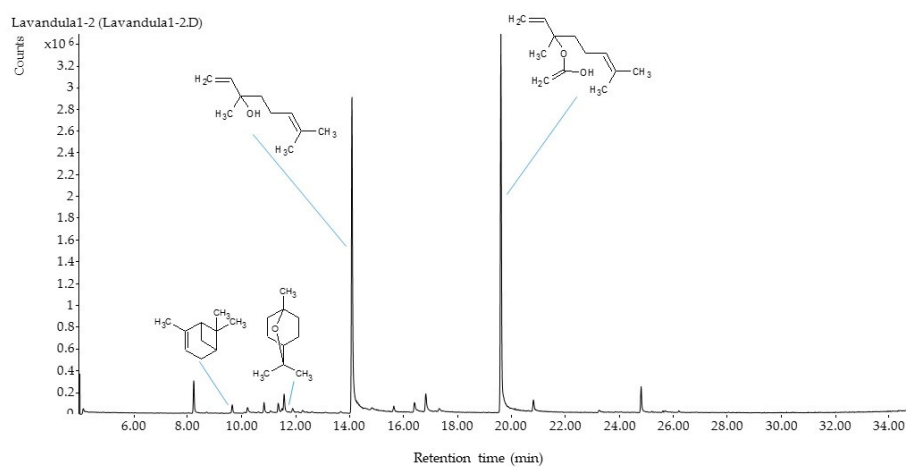

**Figure S1.** Chromatograms of tested EOs measured with GC-MS (Gas Chromatography-Mass Spectrometry).

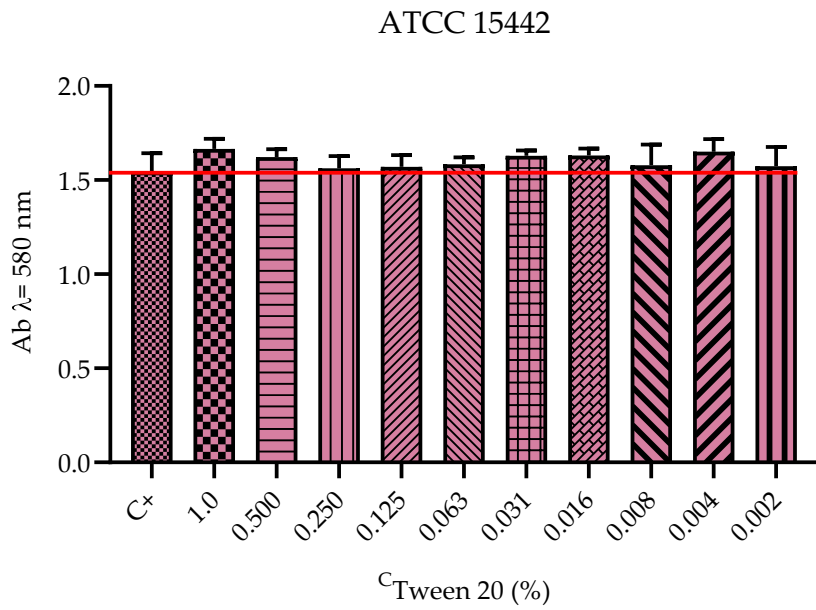

**Figure S2.** The antimicrobial activity of different concentrations (%) (*v/v*) of Tween 20 against planktonic forms of *P. aeruginosa* ATCC 15442 strain. Ab- absorbance after 24 h incubation, C+- untreated cells. The absorbance of untreated cells is marked with a red line.

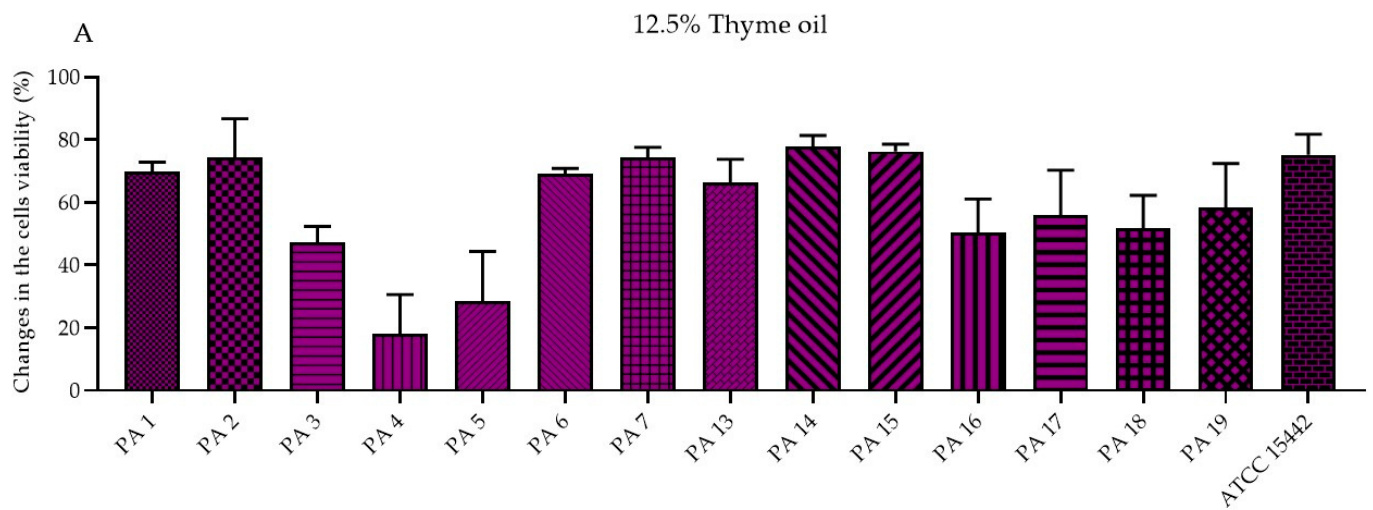

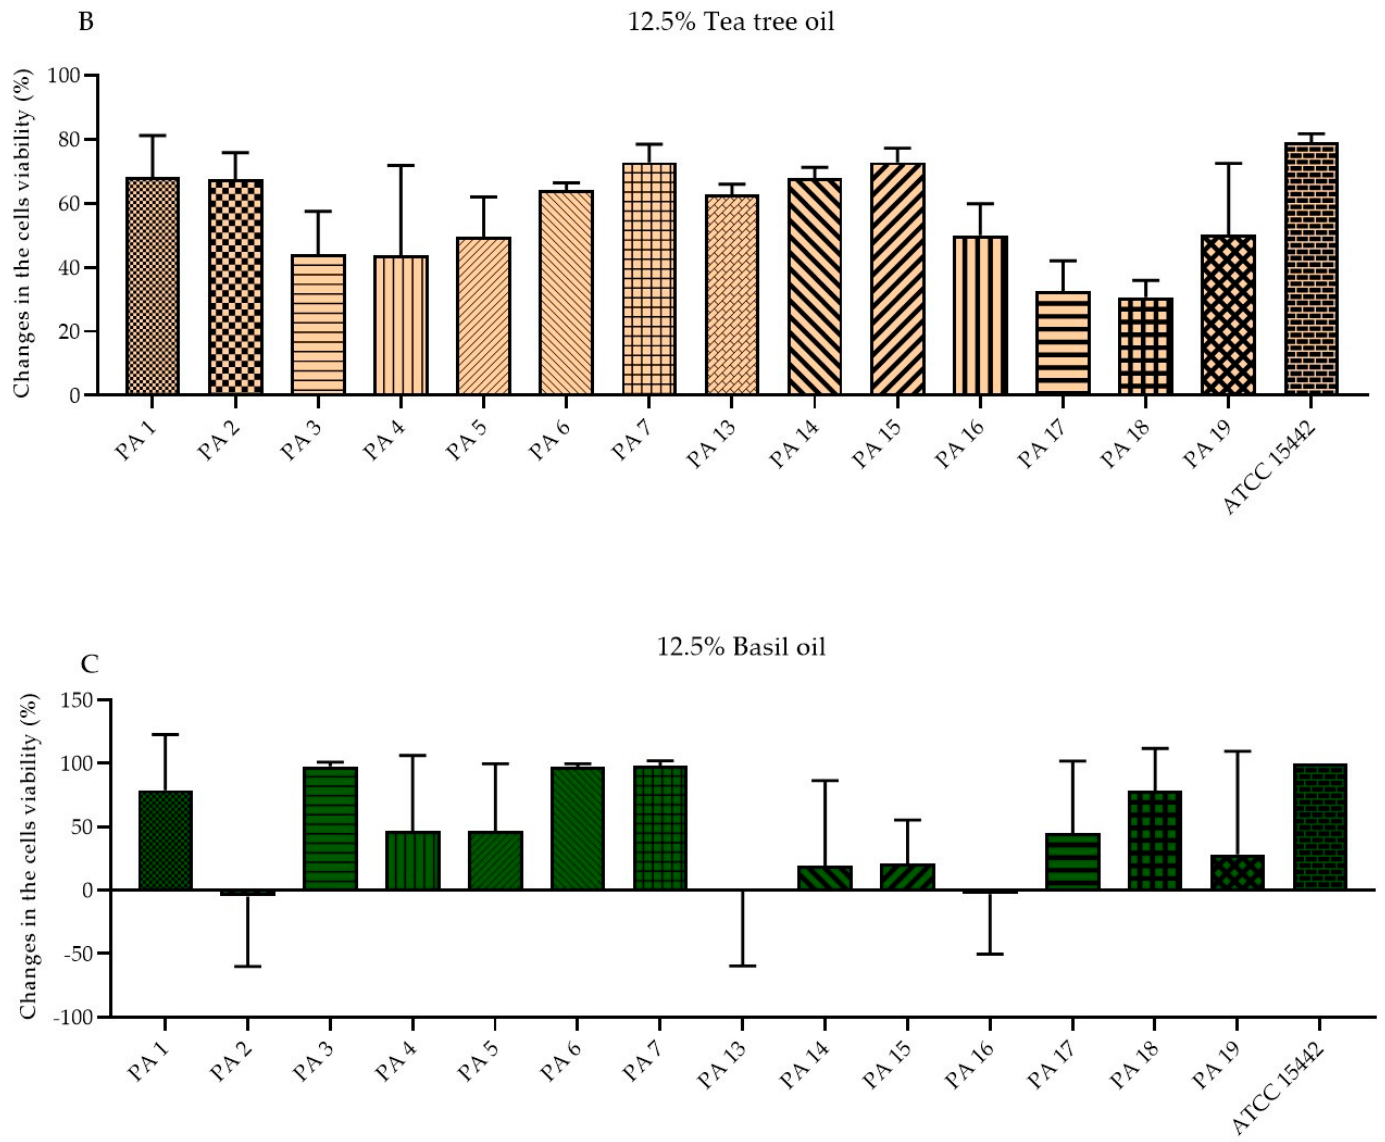

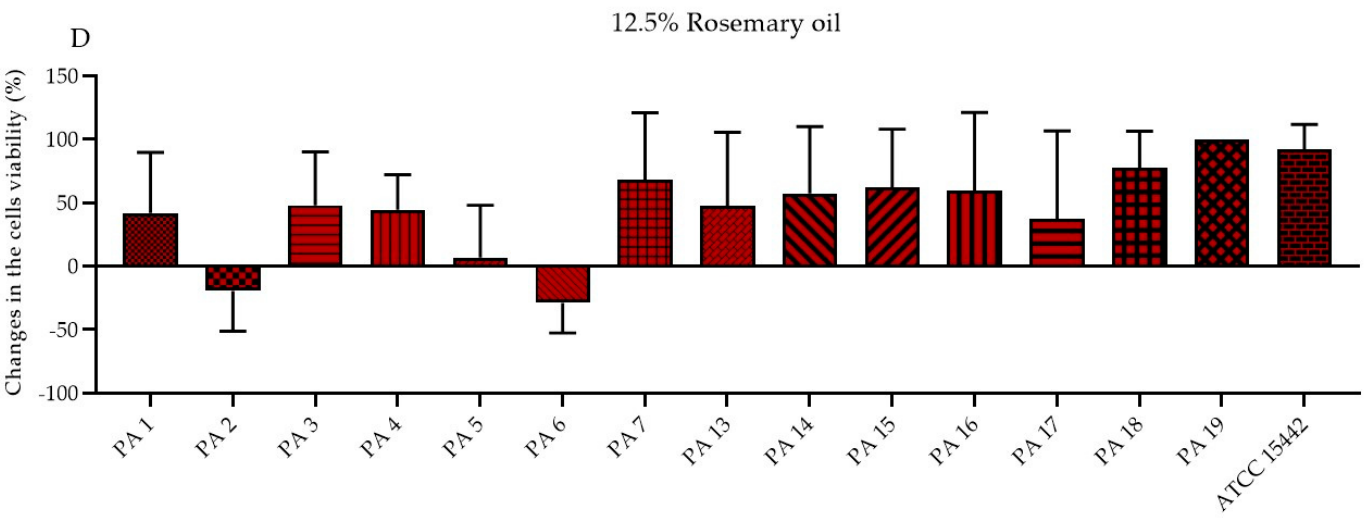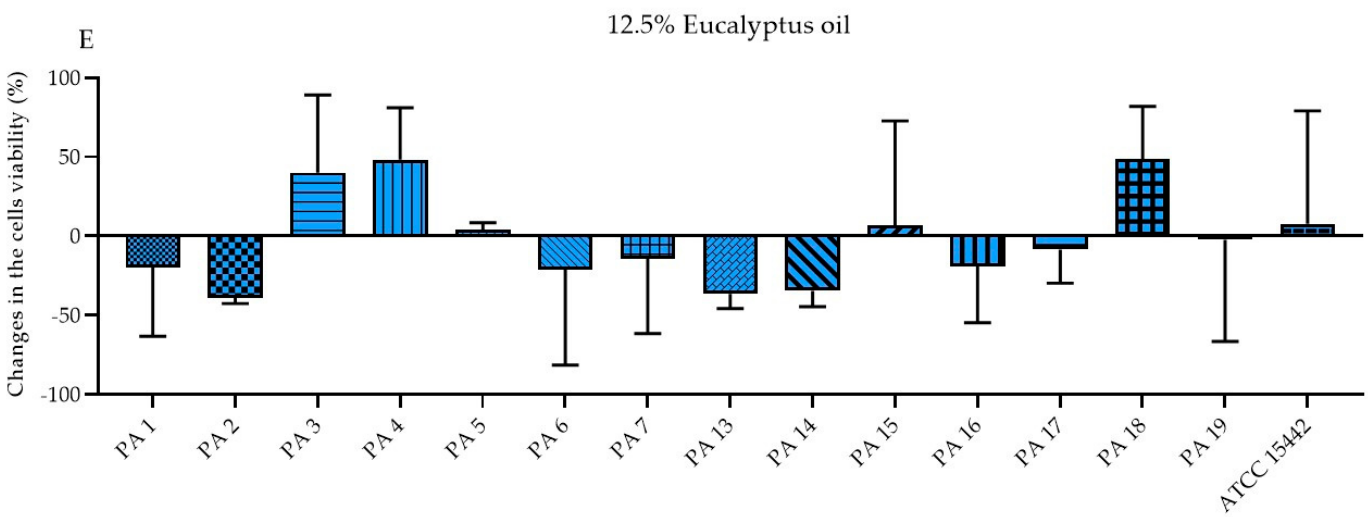

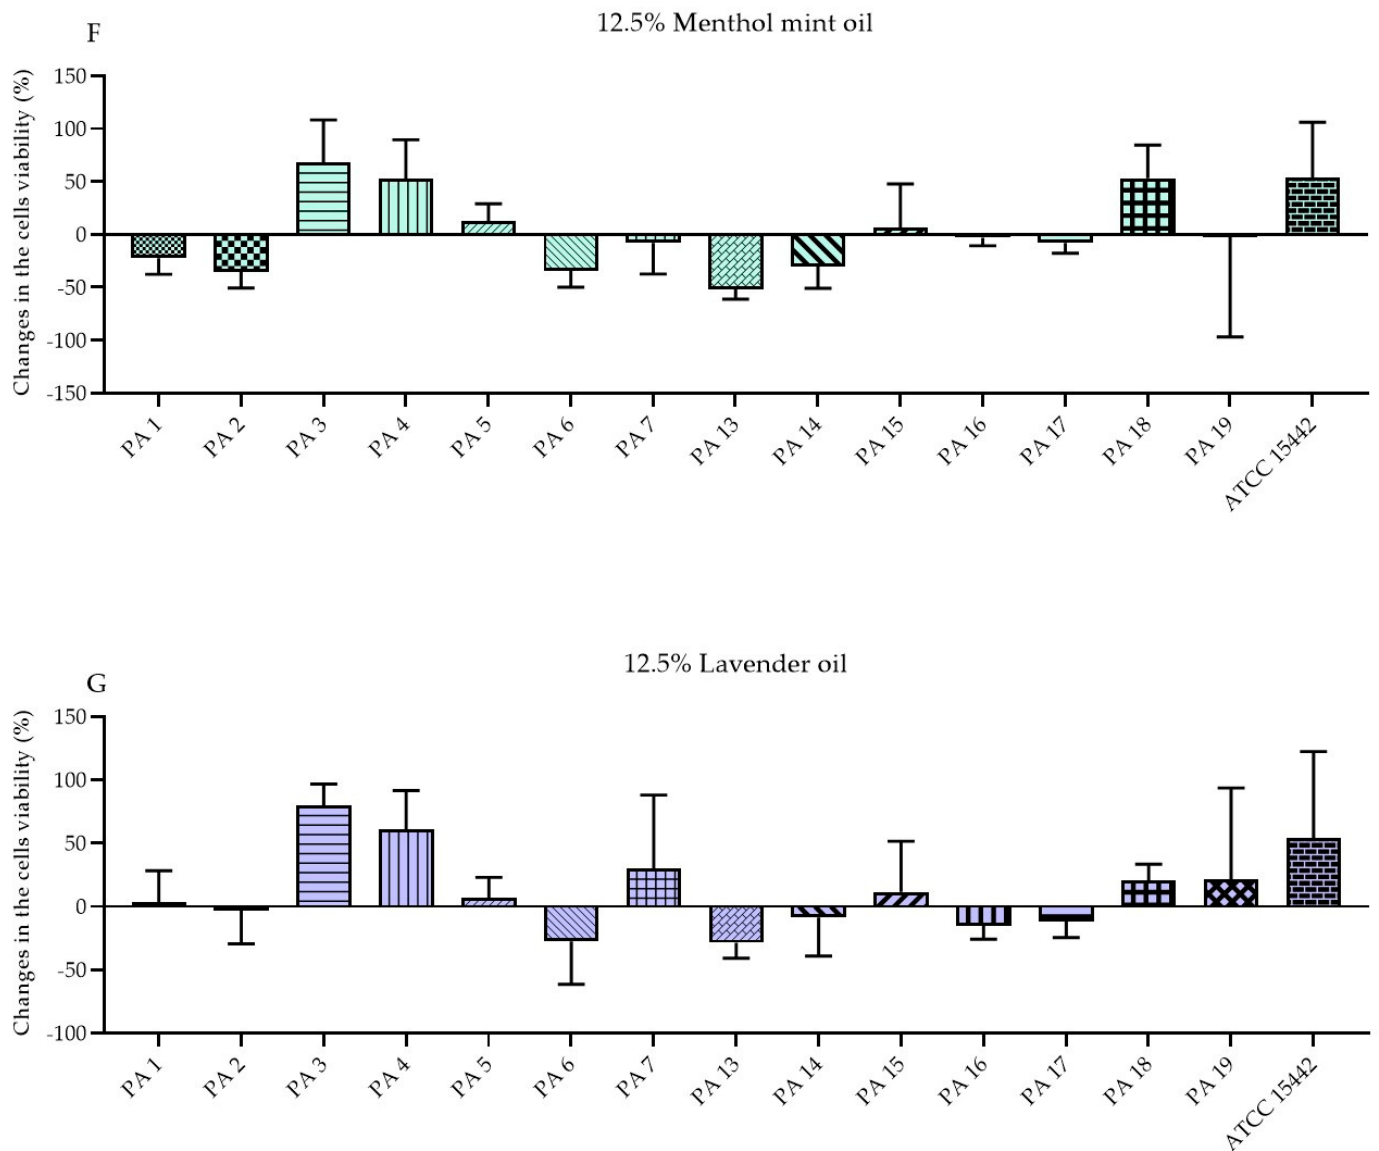

**Figure S3.** Changes in the biofilm-forming cells viability (%) of *P. aeruginosa* clinical (PA 1-7, PA 13- 19) and the reference (ATCC 15442) strains after treatment with emulsified essential oils in their liquid forms in the concentration of 12.5% (v/v). Results of microdilution methodology with (A-B) TTC and (C-G) resazurin staining. Standard deviations are marked. The negative values indicate an increase of biofilm-forming cells' viability after their treatment with EOs in comparison to the growth control (untreated cells).

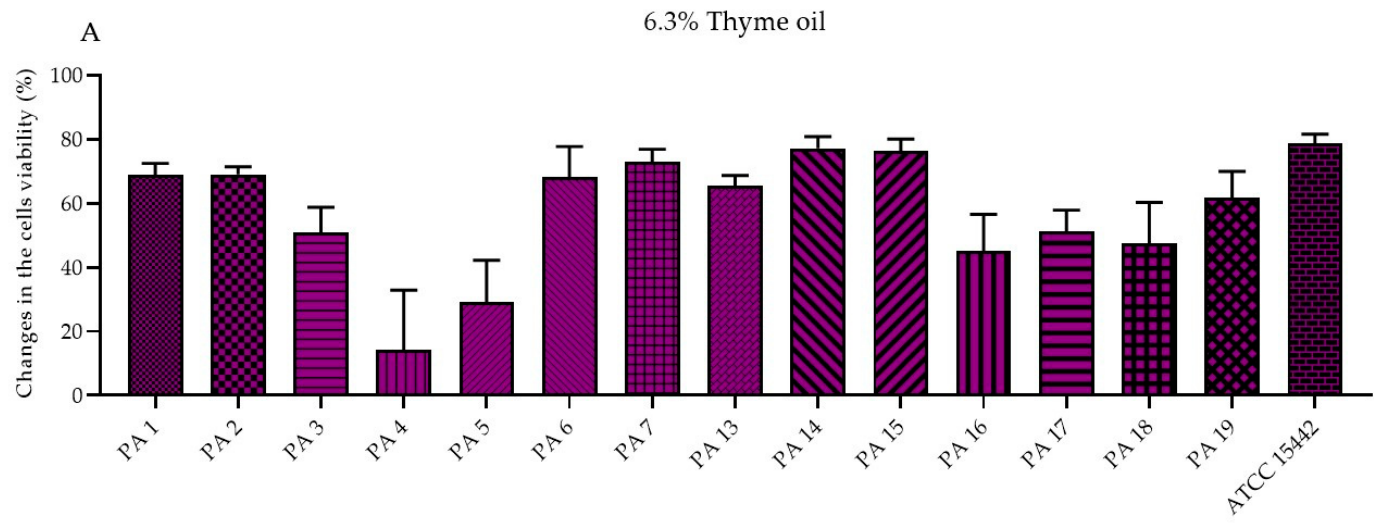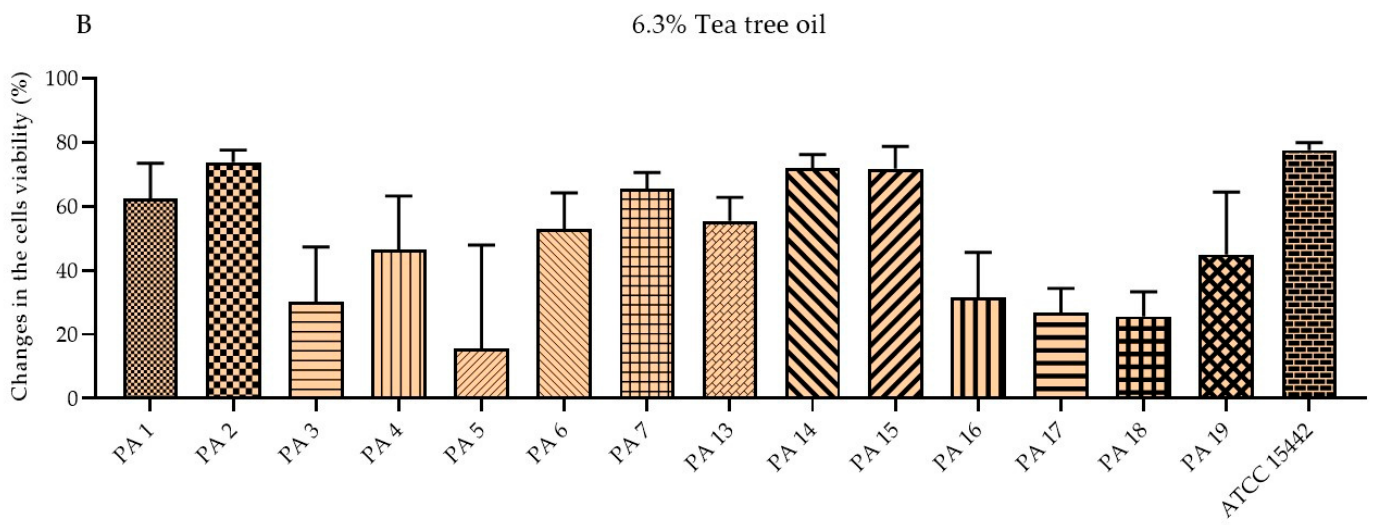

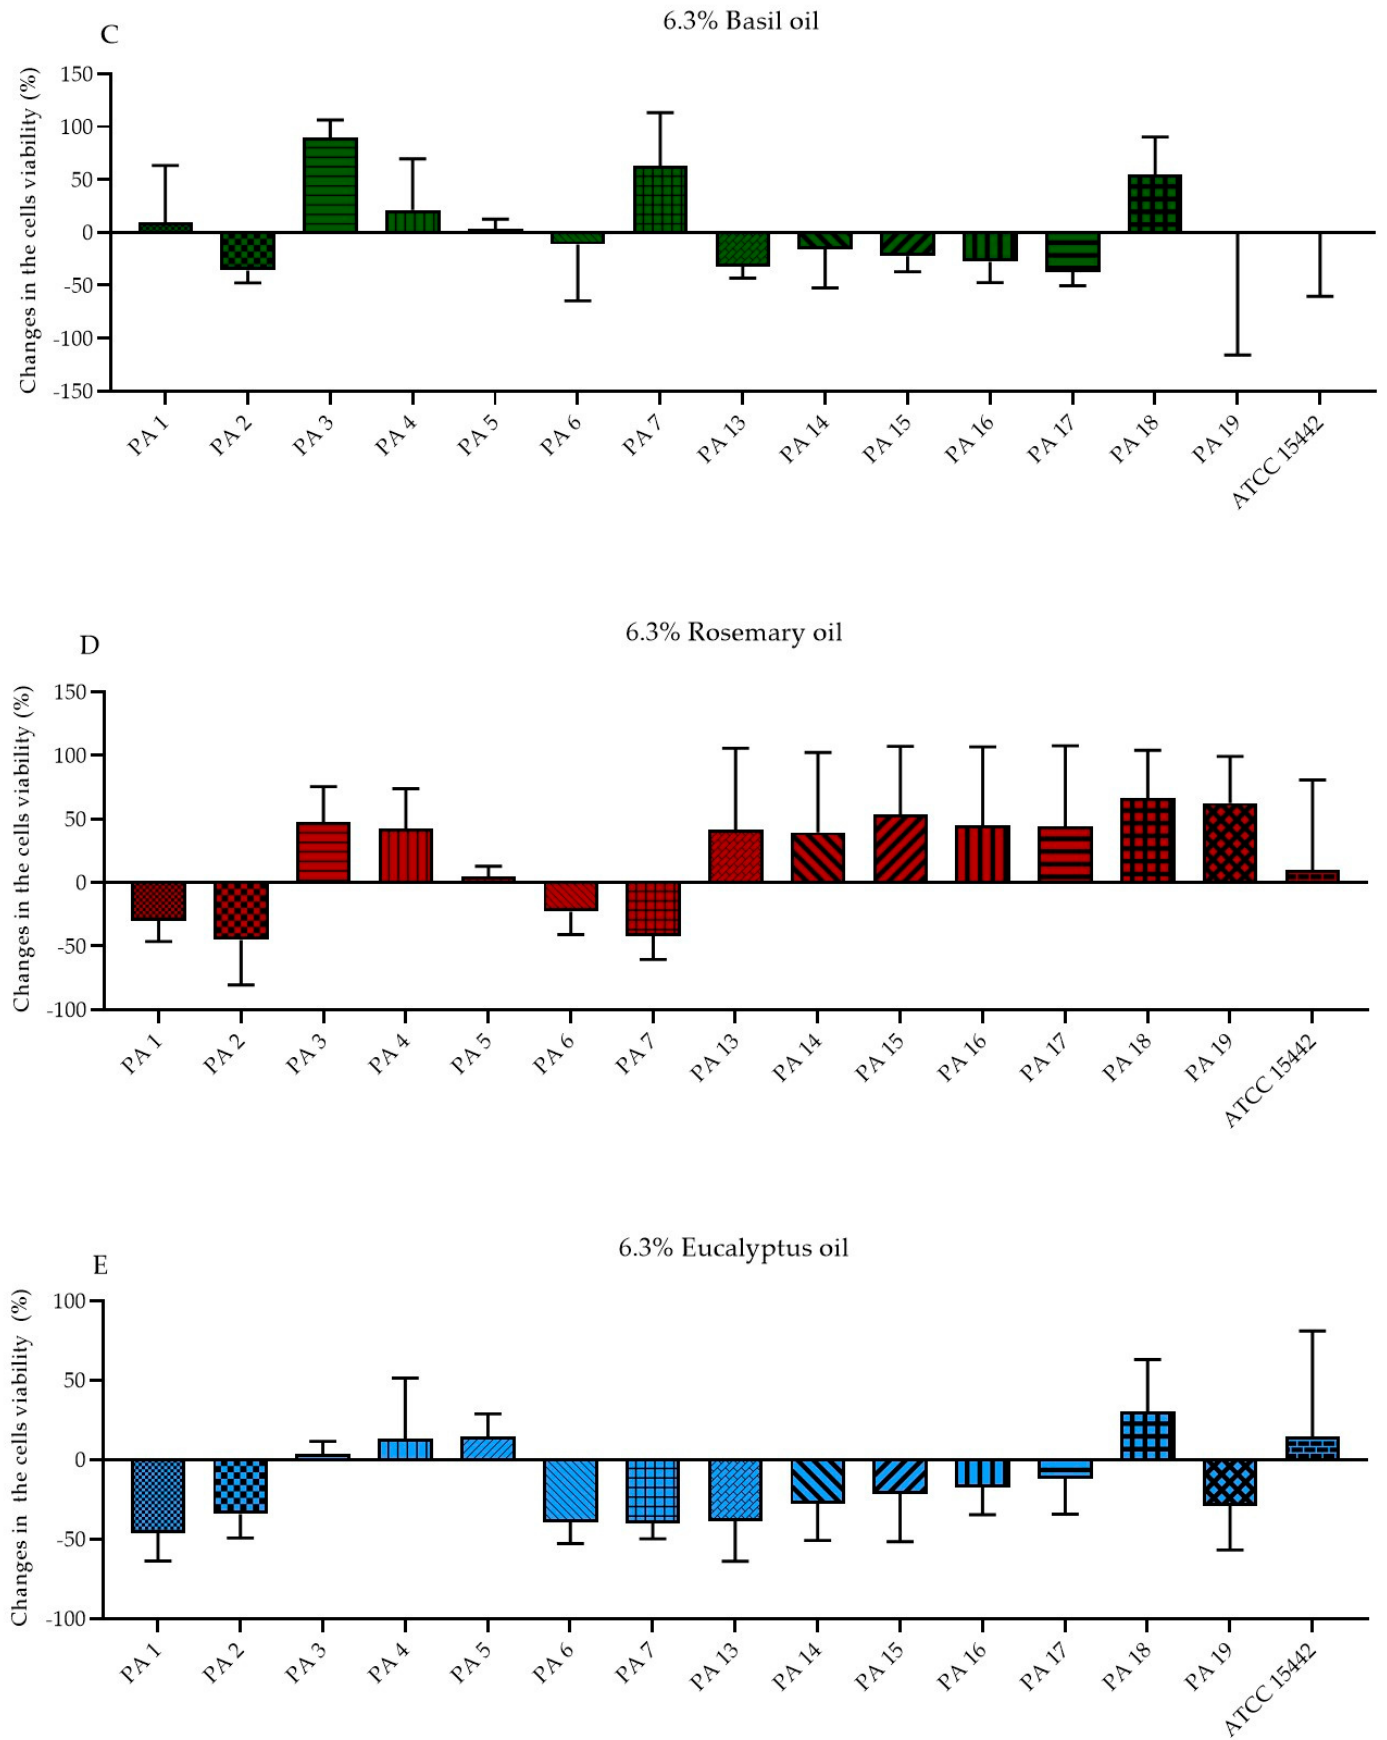

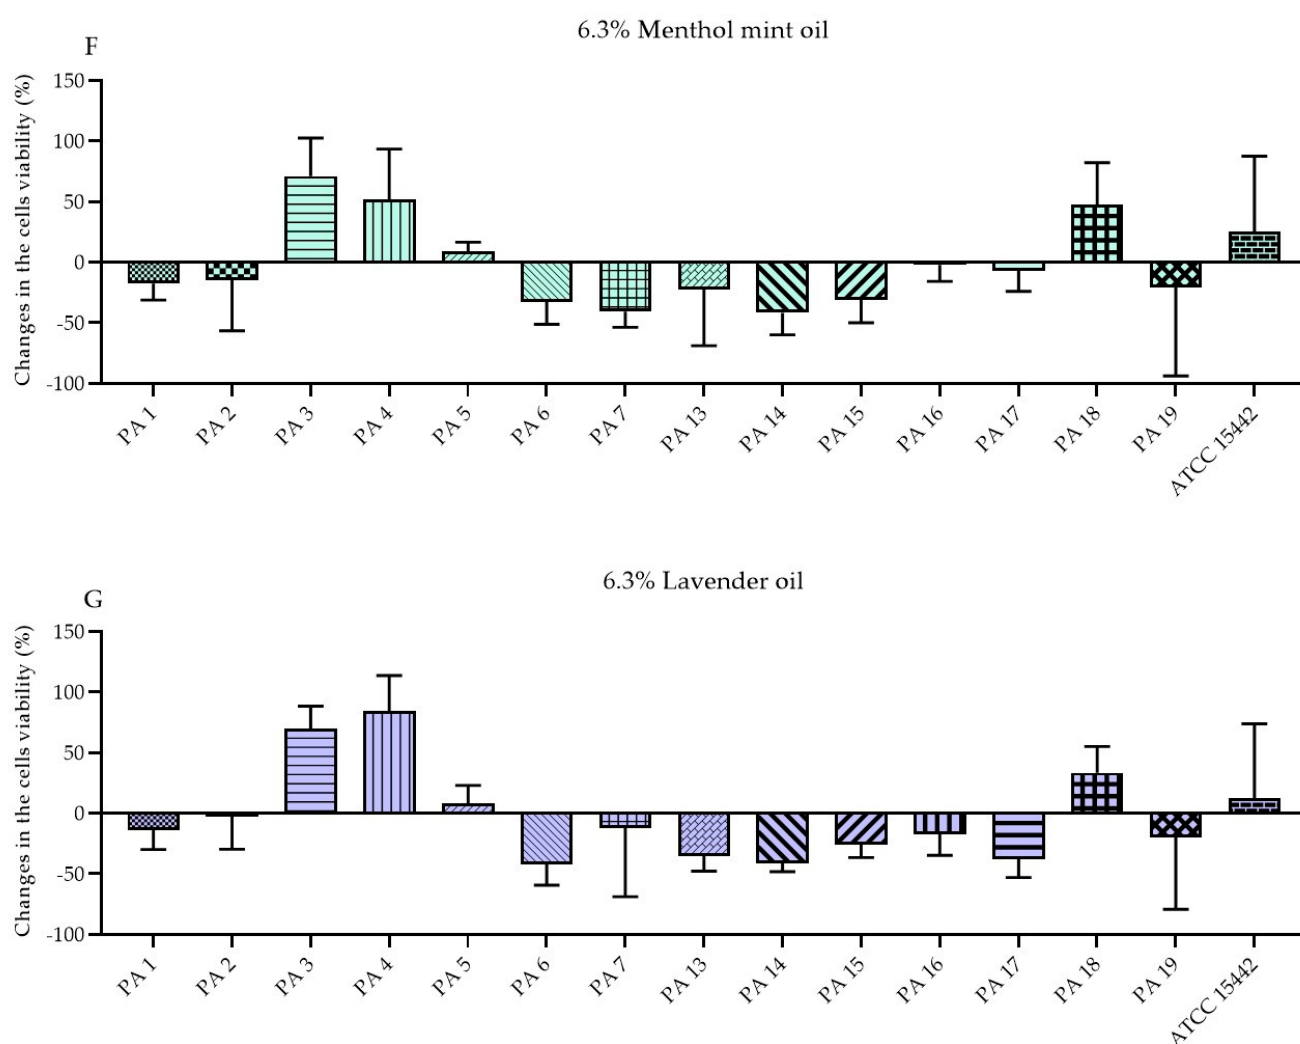

**Figure S4.** Changes in the biofilm-forming cells viability (%) of *P. aeruginosa* clinical (PA 1-7, PA 13-19) and the reference (ATCC 15442) strains after treatment with emulsified essential oils in their liquid forms in the concentration of 6.3% (v/v). Results of microdilution methodology with (A-B) TTC and (C-G) resazurin staining. Standard deviations are marked. The negative values indicate an increase of biofilm-forming cells viability after their treatment with EOs in comparison to the growth control (untreated cells).
